# Supplementary material for: Adherence to a Traditional Mexican Diet Is Associated with Lower Hepatic Steatosis in US-Born Hispanics of Mexican Descent with Overweight or Obesity
Source: MDPI journal article supplement (doi:10.3390/nu15234997), 2023-12-02
Supplement: s1 [file s1]

**Supplementary Table S1.** Description of the traditional Mexican diet score (TMexS)

| Scoring Components             | Men<br>Median<br>(svg/day) | Women<br>Median<br>(svg/day) | Point        |
|--------------------------------|----------------------------|------------------------------|--------------|
| Traditional Mexican foods      |                            |                              |              |
| 1. Whole fruit                 | 0.58                       | 0.84                         | > Median + 1 |
| 2. Vegetables                  | 2.00                       | 2.27                         |              |
| 3. Beans and legumes           | 0.44                       | 0.29                         |              |
| 4. Corn tortilla               | 0.81                       | 0.56                         |              |
| 5. Rice                        | 0.00                       | 0.00                         |              |
| 6. Dairy                       | 0.90                       | 0.96                         |              |
| 7.Mexican Mixed dishes + Soups | 1.80                       | 1.75                         |              |
| 8. Fish and shellfish          | 0.00                       | 0.00                         |              |
| 9. Poultry and eggs            | 1.50                       | 0.93                         |              |
| US / American Foods            |                            |                              |              |
| 10. Processed and red meats    | 0.77                       | 0.48                         | < Median + 1 |
| 11. Added sugars               | 2.56                       | 1.97                         |              |
| 12. Refined grains             | 3.18                       | 3.18                         |              |
| Score Range                    |                            |                              | 0-12 points  |
